# Supplementary material
Source: publisher figshare collection journal article supplement (https://acs.figshare.com/ndownloader/files/3626028)
Supplement: Supplementary file 1 [file 3626028]

*Supporting information for:*

# Exploring the Autoionization and Photo-Induced Proton-Coupled Electron Transfer Pathways of Phenol in Aqueous Solution

*Thomas A. A. Oliver,<sup>1‡</sup> Yuyuan Zhang,<sup>2†‡</sup> Anirban Roy,<sup>2</sup> Michael N. R. Ashfold,<sup>1</sup> and Stephen E. Bradforth<sup>2,\*</sup>*

<sup>1</sup> School of Chemistry, University of Bristol, Bristol, BS8 1TS, UK, <sup>2</sup> University of Southern California, CA 90089 USA

## AUTHOR INFORMATION

### Corresponding Author

\* email: [stephen.bradforth@usc.edu](mailto:stephen.bradforth@usc.edu). Tel: (213) 740-0461. Fax: (213) 740-3972

† Department of Chemistry and Biochemistry, Montana State University, Bozeman, MT 59717, USA

‡ These authors contributed equally to this work

## Experimental Apparatus

The experimental apparatus has been detailed previously.<sup>1</sup> Briefly, 267 nm pump pulses were generated by sum-frequency mixing the 800 nm fundamental from a Coherent Legend (30 fs, 32 nm bandwidth, 1 kHz) and its second harmonic, 400 nm, in a type-II BBO crystal, yielding a bandwidth of 2 nm and a pulse duration of 100 fs. 200 nm pump pulses with a pulse duration of 200 fs were generated by sum-frequency mixing the 267 nm and the 800 nm fundamental in a type-I BBO crystal. All experiments employed pump pulse energies in the range 0.4–1.2  $\mu\text{J}$  with a pump spot size between 100–250  $\mu\text{m}$  (FWHM). TA signals from water solvent were negligible under these experimental conditions for 267 and 200 nm pump pulses. Pump fluence studies established that all TA signals scaled linearly with pump laser intensity over the range of pulse energies used. Broadband white light super-continuum probe pulses were generated by focusing a small portion of the 800 nm fundamental into a rotating  $\text{CaF}_2$  disk. The probe pulse was focused into the sample using an off-axis parabolic mirror to a spot size of approximately 50  $\mu\text{m}$  (FWHM). The relative pump–probe pulse polarization (magic angle,  $54.7^\circ$ ) was controlled by rotating the electric field vector of the 800 nm fundamental used to generate the super continuum light via a zero-order half waveplate. The polarization purity of the continuum was determined to be  $>150:1$  across the whole probe range (310– 650 nm), and that of the pump pulses  $>100:1$ , as measured by the extinction of the light through a calcite polarizer. All TA experiments employed a wire-guided gravity jet to deliver phenol solutions with a linear flow rate of  $1 \text{ mm ms}^{-1}$ , ensuring that successive laser shots (1 ms time separation) interrogated a fresh sample.<sup>2</sup> The instrument response function at the two pump wavelengths was determined by cross-correlation of the UV pump and white light super-continuum probe to be 110 fs and 200 fs for 267 nm and 200 nm pump wavelengths, respectively. Phenol (99.5%, Avocado Research Chemicals) was dissolved in distilled deionized  $\text{H}_2\text{O}$  (Millipore) and  $\text{D}_2\text{O}$  (Cambridge Isotope Laboratories) without further purification, to make 18 and 90 mM solutions.  $^1\text{H}$  NMR and FT-IR were used to follow the exchange of the OH functional group to OD when samples were prepared in  $\text{D}_2\text{O}$  instead of  $\text{H}_2\text{O}$ . The spectra revealed negligible signatures of phenol- $h_6$  and could be entirely assigned to phenol- $d_1$ .

To extract the solvated electron quantum yield arising from 200 nm irradiation of an aqueous solution of phenol, a calibration was performed using the known photodetachment quantum yield for  $\text{OH}^-$ .<sup>3,4</sup> An aqueous solution of NaOH with an absorbance at 200 nm equal to the phenol solution was prepared. Sequential transient absorption experiments were then carried out for these two solutions under identical experimental conditions. From the relative  $\Delta\text{OD}$  signal at  $\lambda_{\text{probe}} = 600$  nm and  $t = 2$  ps (a pump-probe time delay when the ejected electron has become entirely solvated), the electron quantum yield arising from photoexcitation of phenol in water was determined.

The quantum yield for phenoxyl radical and solvated electron formation following 267 nm excitation was obtained by calibration against the known photodetachment quantum yield for phenolate ( $\text{PhO}^-$ ).<sup>5</sup> A solution of phenolate (sodium salt) was prepared to match the absorbance at 267 nm of an aqueous solution of phenol. For the phenoxyl radical, the  $\Delta\text{OD}$  signals at 400 nm, obtained from the back-to-back transient absorption experiments, were used to calculate the phenoxyl radical quantum yield.

## Transient absorption measurements: 200 nm $H^+$ scavenger experiments

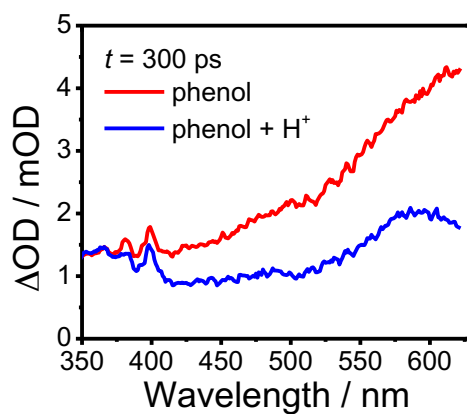

**Figure S1** 200 nm pump TA spectra for 18 mM phenol- $h_6$ /H<sub>2</sub>O solution measured at  $t = 300$  ps with (blue line) and without (red line) 0.5 M HCl electron scavengers. The difference in the two spectra identifies the formation of solvated electrons. The small transient at  $\sim 580$  nm arises from a parallel phenol excimer formation channel, as previously determined.<sup>6</sup>

## Free Energy Landscape for Free and Solvated Phenol

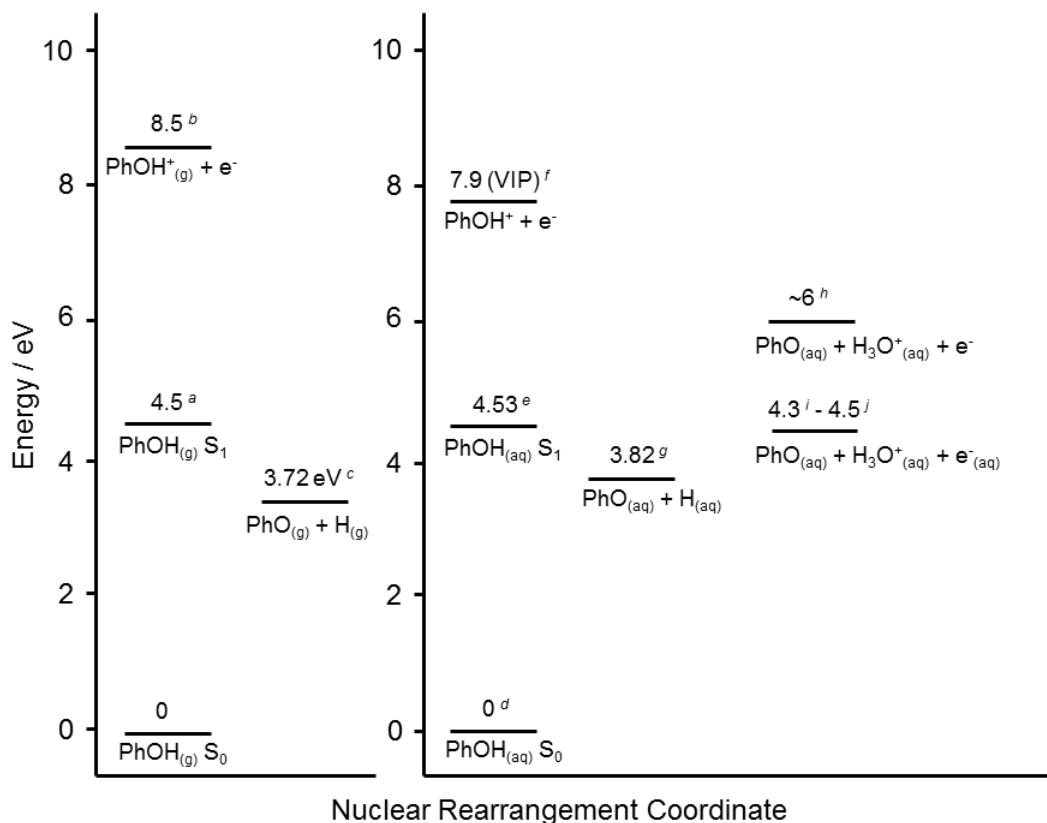

**Figure S2** Free energy landscape of phenol and its photoproducts: isolated gas phase molecule (left), aqueous solution (right). The energy (in eV) of each state is labeled on top of the horizontal line.

<sup>a</sup> Gas phase phenol  $S_1$ - $S_0$  origin ( $\lambda = 275.113$  nm)<sup>7</sup>

<sup>b</sup> Gas phase phenol vertical ionization potential<sup>8</sup>

<sup>c</sup> Asymptotic value for producing isolated ground state  $\text{PhO}^\bullet$  and H atom radicals<sup>7,9</sup>

<sup>d</sup> The absolute energy of ground state phenol in water is 0.6 eV lower than in the gas phase, due to the solvation enthalpy ( $\Delta H_{\text{solv}}$ )<sup>10</sup>

<sup>e</sup> The phenol  $S_1$  origin in water is estimated from the shift in UV absorption spectra between cyclohexane and water solutions

<sup>f</sup> Vertical ionization potential of phenol in aqueous solution<sup>11</sup>

<sup>g</sup> Asymptotic value for producing solvated  $\text{PhO}^\bullet$  and H atom radicals. This value is estimated from the solvation enthalpy of  $\text{PhO}^\bullet$  ( $\Delta H_{\text{solv}} = -0.4$  eV)<sup>10</sup> and solvation free energy of H atom ( $\Delta G_{\text{solv}} = -0.1$  eV)<sup>12</sup>

<sup>h</sup> The onset of the photoelectron spectrum for phenol aqueous solution.<sup>11</sup> Note that the free energy release upon proton transfer from phenol cation to surrounding water is small compared to the uncertainty of the position of the onset ( $\Delta G = -0.15$  eV)<sup>13</sup>, and thus not included in the estimate.

<sup>i</sup> Asymptotic value for producing fully solvated  $\text{PhO}^\bullet$  radical, proton and electron, estimated from the electron attachment energy in water ( $\Delta G = -1.54$  eV)<sup>14</sup>

<sup>j</sup> Asymptotic value for producing fully solvated  $\text{PhO}^\bullet$  radical, proton and electron, estimated from the proton transfer from the H atom to water:  $\text{H}_{(aq)} + \text{H}_2\text{O} \leftrightarrow \text{H}_3\text{O}^+_{(aq)} + e^-_{(aq)}$  ( $\Delta G = +0.5$  eV)<sup>15</sup>

## Transient absorption measurements: 267 nm H<sup>+</sup> scavenger experiments

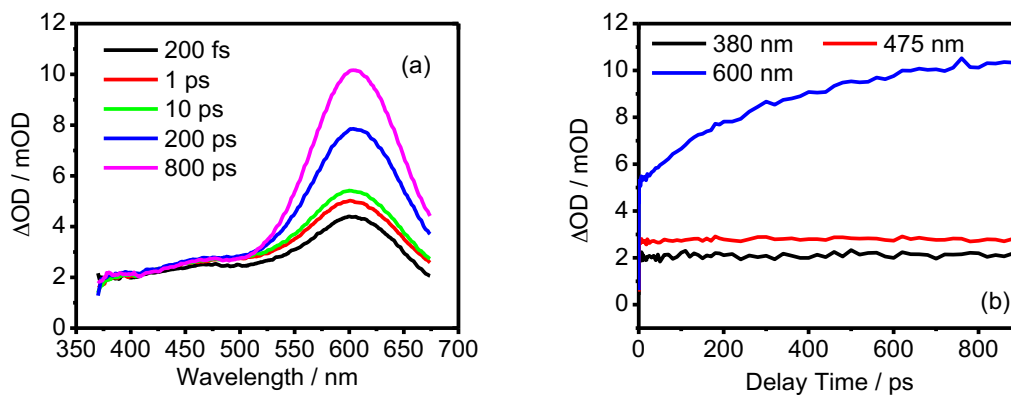

**Figure S3** (a) 267 nm pump TA spectra for 90 mM phenol-*h*<sub>6</sub>/H<sub>2</sub>O solution measured at the displayed pump-probe time delays. (b) Kinetics at selected probe wavelengths obtained from the TA experiment.

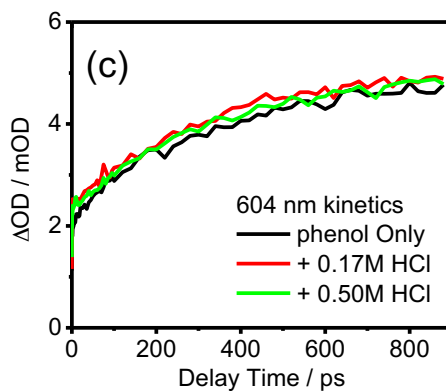

(c) Kinetics of the 604nm feature obtained in 90 mM phenol-*h*<sub>6</sub>/H<sub>2</sub>O (black), 90 mM phenol/0.17 M HCl (red) and 90 mM phenol/0.50 M HCl (green) solutions.

## Possible Geminate Recombination Pathways

The following reactions are all the possible geminate recombination pathways (1-4) that will affect the yield of phenoxyl and solvated electron species in our transient absorption data:

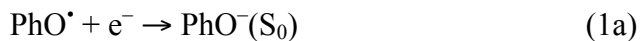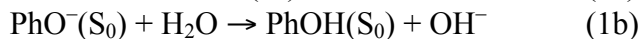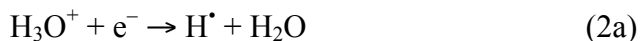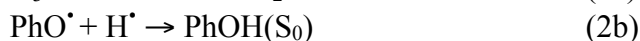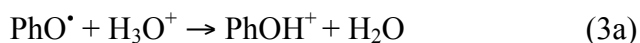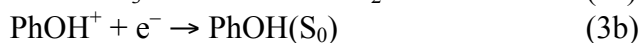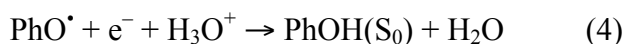

We favor recombination via either reaction 1 or 2, as the product of reaction 3a is known to be unstable (see main paper), precluding reaction 3b. The three-body recombination, reaction 4, is disfavored on entropic grounds.

Process 1a will have the same contact rate as the geminate recombination determined in the photodetachment of phenolate,<sup>5</sup> and will likely be a more important process than reaction 2a; the recombination of two charged products. We rationalize this on energetic grounds; there will be a far larger energy barrier associated with re-organizing the two solvent shells around the separately solvated  $\text{H}_3\text{O}^+$  and  $\text{e}^-$  ions, compared to one radical ( $\text{PhO}^\bullet$ ) and a solvated electron.

## REFERENCES

- (1) Rivera, C. A.; Winter, N.; Harper, R. V.; Benjamin, I.; Bradforth, S. E. The Dynamical Role of Solvent on the ICN Photodissociation Reaction: Connecting Experimental Observables Directly with Molecular Dynamics Simulations. *Phys. Chem. Chem. Phys.* **2011**, *13*, 8269–8283.
- (2) Tauber, M. J.; Mathies, R. A.; Chen, X.; Bradforth, S. E. Flowing Liquid Sample Jet for Resonance Raman and Ultrafast Optical Spectroscopy. *Rev. Sci. Instrum.* **2003**, *74*, 4958–4960.
- (3) Lian, R.; Crowell, R. A.; Shkrob, I. A.; Bartels, D. M.; Oulianov, D. A.; Gosztola, D. Recombination of Geminate ( $\text{OH}$ ,  $\text{E}_{\text{aq}}^-$ ) Pairs in Concentrated Alkaline Solutions: Lack of Evidence for Hydroxyl Radical Deprotonation. *Chem. Phys. Lett.* **2004**, *389*, 379–384.
- (4) Crowell, R. A.; Lian, R.; Shkrob, I. A.; Bartels, D. M.; Chen, X.; Bradforth, S. E. Ultrafast Dynamics for Electron Photodetachment From Aqueous Hydroxide. *J. Chem. Phys.* **2004**, *120*, 11712–11725.
- (5) Chen, X.; Larsen, D. S.; Bradforth, S. E.; van Stokkum, I. H. M. Broadband Spectral Probing Revealing Ultrafast Photochemical Branching After Ultraviolet Excitation of the Aqueous Phenolate Anion. *J. Phys. Chem. A* **2011**, *115*, 3807–3819.
- (6) Zhang, Y.; Oliver, T. A. A.; Ashfold, M. N. R.; Bradforth, S. E. Contrasting the Excited State Reaction Pathways of Phenol and Para-Methylthiophenol in the Gas and Liquid Phases. *Faraday Discuss.* **2012**, *157*, 141–163.
- (7) Nix, M. G. D.; Devine, A. L.; Cronin, B.; Dixon, R. N.; Ashfold, M. N. R. High Resolution Photofragment Translational Spectroscopy Studies of the Near Ultraviolet Photolysis of Phenol. *J. Chem. Phys.* **2006**, *125*, 133318.
- (8) Lipert, R. J.; Colson, S. D. Accurate Ionization Potentials of Phenol and Phenol-( $\text{H}_2\text{O}$ ) From the Electric Field Dependence of the Pump–Probe Photoionization Threshold. *J. Chem. Phys.* **1990**, *92*, 3240.
- (9) King, G. A.; Oliver, T. A. A.; Nix, M. G. D.; Ashfold, M. N. R. High Resolution Photofragment Translational Spectroscopy Studies of the Ultraviolet Photolysis of Phenol-  $\text{D}_5$ . *J. Phys. Chem. A* **2009**, *113*, 7984–7993.
- (10) Guedes, R. C.; Coutinho, K.; Costa Cabral, B. J.; Canuto, S. Differential Hydration of Phenol and Phenoxy Radical and the Energetics of the Phenol OH Bond in Solution. *J. Phys. Chem. B* **2003**, *107*, 4304–4310.
- (11) Ghosh, D.; Roy, A.; Seidel, R.; Winter, B.; Bradforth, S.; Krylov, A. I. First-Principle Protocol for Calculating Ionization Energies and Redox Potentials of Solvated Molecules and Ions: Theory and Application to Aqueous Phenol and Phenolate. *J. Phys. Chem. B* **2012**, *116*, 7269–7280.
- (12) Gai, H.; Garrett, B. C. Path Integral Calculations of the Free Energies of Hydration of Hydrogen Isotopes (H, D, and Mu). *J. Phys. Chem.* **1994**, *98*, 9642–9648.
- (13) Das, T. N. Oxidation of Phenol in Aqueous Acid: Characterization and Reactions of Radical Cations Vis-à-Vis the Phenoxy Radical. *J. Phys. Chem. A* **2005**, *109*, 3344–3351.
- (14) Zhan, C.-G.; Dixon, D. A. The Nature and Absolute Hydration Free Energy of the Solvated Electron in Water. *J. Phys. Chem. B* **2003**, *107*, 4403–4417.
- (15) Marsalek, O.; Frigato, T.; VandeVondele, J.; Bradforth, S. E.; Schmidt, B.; Schütte, C.; Jungwirth, P. Hydrogen Forms in Water by Proton Transfer to a Distorted Electron. *J. Phys. Chem. B* **2010**, *114*, 915–920.
